# Supplementary material for: Pheromone and morphometric features of honey bee (Apis mellifera) queens from around the globe
Source: Research Square preprint supplement (doi:10.21203/rs.3.rs-7586652/v1), 2025-09-25
Supplement: Supplementary file 1 [file 56d2bb758a3a9bd85100eddb.xlsx]

## Sheet: Metadata
Sample	Location	Breed	Vaccine	Country	Category	Isolate
001	USA	Saskatraz	No	USA	Foreign	Yes
002	USA	Saskatraz	No	USA	Foreign	No
003	USA	Saskatraz	No	USA	Foreign	No
007	USA	Saskatraz	No	USA	Foreign	Yes
010	USA	Saskatraz	No	USA	Foreign	Yes
011	USA	Carniolan	No	USA	Foreign	Yes
012	USA	Carniolan	No	USA	Foreign	Yes
015	USA	Carniolan	No	USA	Foreign	No
016	USA	Carniolan	No	USA	Foreign	No
020	USA	Carniolan	No	USA	Foreign	Yes
021	USA	Carniolan	Yes	USA	Foreign	Yes
024	USA	Carniolan	Yes	USA	Foreign	Yes
025	USA	Carniolan	Yes	USA	Foreign	No
026	USA	Carniolan	Yes	USA	Foreign	No
029	USA	Carniolan	Yes	USA	Foreign	Yes
031	USA	Italian	Yes	USA	Foreign	No
032	USA	Italian	Yes	USA	Foreign	Yes
034	USA	Italian	Yes	USA	Foreign	Yes
036	USA	Italian	Yes	USA	Foreign	Yes
037	USA	Italian	Yes	USA	Foreign	No
041	Italy	Buckfast	No	Italy	Foreign	Yes
042	Italy	Buckfast	No	Italy	Foreign	Yes
045	Italy	Buckfast	No	Italy	Foreign	No
047	Italy	Buckfast	No	Italy	Foreign	Yes
050	Italy	Buckfast	No	Italy	Foreign	No
052	USA	Carniolan	No	USA	Foreign	No
053	USA	Carniolan	No	USA	Foreign	No
055	USA	Carniolan	No	USA	Foreign	Yes
057	USA	Carniolan	No	USA	Foreign	Yes
058	USA	Carniolan	No	USA	Foreign	Yes
061	Australia	Italian	No	Australia	Foreign	Yes
062	Australia	Italian	No	Australia	Foreign	Yes
063	Australia	Italian	No	Australia	Foreign	No
067	Australia	Italian	No	Australia	Foreign	No
069	Australia	Italian	No	Australia	Foreign	Yes
072	Chile	Carniolan	No	Chile	Foreign	No
073	Chile	Carniolan	No	Chile	Foreign	Yes
075	Chile	Carniolan	No	Chile	Foreign	Yes
077	Chile	Carniolan	No	Chile	Foreign	No
078	Chile	Carniolan	No	Chile	Foreign	Yes
081	ON	Buckfast	No	Canada	Domestic	No
084	ON	Buckfast	No	Canada	Domestic	No
087	ON	Buckfast	No	Canada	Domestic	Yes
088	ON	Buckfast	No	Canada	Domestic	Yes
089	ON	Buckfast	No	Canada	Domestic	Yes
091	ON	Buckfast	No	Canada	Domestic	No
092	ON	Buckfast	No	Canada	Domestic	Yes
094	ON	Buckfast	No	Canada	Domestic	Yes
095	ON	Buckfast	No	Canada	Domestic	No
100	ON	Buckfast	No	Canada	Domestic	Yes
101	ON	Buckfast	No	Canada	Domestic	No
104	ON	Buckfast	No	Canada	Domestic	No
105	ON	Buckfast	No	Canada	Domestic	Yes
107	ON	Buckfast	No	Canada	Domestic	Yes
109	ON	Buckfast	No	Canada	Domestic	Yes
112	ON	Mixed	No	Canada	Domestic	Yes
113	ON	Mixed	No	Canada	Domestic	Yes
114	ON	Mixed	No	Canada	Domestic	Yes
118	ON	Mixed	No	Canada	Domestic	No
120	ON	Mixed	No	Canada	Domestic	No
131	ON	Mixed	No	Canada	Domestic	Yes
132	ON	Mixed	No	Canada	Domestic	Yes
136	ON	Mixed	No	Canada	Domestic	No
139	ON	Mixed	No	Canada	Domestic	Yes
140	ON	Mixed	No	Canada	Domestic	No
141	ON	Italian	No	Canada	Domestic	No
142	ON	Italian	No	Canada	Domestic	Yes
145	ON	Italian	No	Canada	Domestic	Yes
146	ON	Italian	No	Canada	Domestic	No
149	ON	Italian	No	Canada	Domestic	Yes
161	ON	Mixed	No	Canada	Domestic	Yes
163	ON	Mixed	No	Canada	Domestic	Yes
166	ON	Mixed	No	Canada	Domestic	No
168	ON	Mixed	No	Canada	Domestic	No
169	ON	Mixed	No	Canada	Domestic	Yes
171	ON	Buckfast	No	Canada	Domestic	Yes
172	ON	Buckfast	No	Canada	Domestic	Yes
175	ON	Buckfast	No	Canada	Domestic	Yes
178	ON	Buckfast	No	Canada	Domestic	No
179	ON	Buckfast	No	Canada	Domestic	No
181	QC	Mixed	No	Canada	Domestic	Yes
182	QC	Mixed	No	Canada	Domestic	Yes
184	QC	Mixed	No	Canada	Domestic	No
185	QC	Mixed	No	Canada	Domestic	Yes
190	QC	Mixed	No	Canada	Domestic	No
191	AB	Mixed	No	Canada	Domestic	Yes
192	AB	Mixed	No	Canada	Domestic	No
195	AB	Mixed	No	Canada	Domestic	No
196	AB	Mixed	No	Canada	Domestic	Yes
197	AB	Mixed	No	Canada	Domestic	Yes
201	BC	Mixed	No	Canada	Domestic	Yes
204	BC	Mixed	No	Canada	Domestic	No
205	BC	Mixed	No	Canada	Domestic	Yes
207	BC	Mixed	No	Canada	Domestic	Yes
210	BC	Mixed	No	Canada	Domestic	No

## Sheet: Pheromones
Sample	ODA	MO	HDA	LEA	CA	HOB	HVA	CUDA
001	1.9603e+06	14092.3	451183	1565.67	108.795	5321.33	11306.5	25256.6
002	2.54362e+06	17357.7	700498	1482.34	79.9628	5017.35	4360.46	25324.1
003	2.71409e+06	16871.3	908542	1584.78	326.225	11068.1	20814.8	25620.6
007	2.71772e+06	10102.5	589010	1353.64	152.037	4273.15	14862.9	25828.2
010	2.38296e+06	19872.6	742300	1849.54	105.444	8778.22	7987.04	26763.9
011	1.6778e+06	20364.4	217034	1661.39	65.5518	7184.72	3431.21	26759
012	1.83728e+06	26017.9	766490	1931.34	125.881	29190.8	13443.2	28209.7
015	1.8577e+06	18007.1	529592	1776.32	111.981	4591.19	2876.44	28120.4
016	2.07371e+06	12530.7	899700	2580.24	105.799	3755.56	4214.88	25420.7
020	2.24806e+06	23295.8	696647	1977.86	118.251	16055.2	6303.54	26553.5
021	2.05696e+06	15243.7	644005	1482.06	150.4	10755.6	5926.69	26597.1
024	887268	13247.5	355427	1928.67	68.4861	3913.51	3316.08	27446.4
025	1.71648e+06	13812.7	355564	1260.78	84.7807	3719.24	3788.59	25185.9
026	2.39503e+06	13316.1	1.03379e+06	1912.97	146.616	8245.55	5776.21	26506.3
029	589468	12643.9	368657	1757.16	72.9474	4371.56	2989.86	26019.5
031	2.39093e+06	11126.1	782189	2529.39	92.2178	3337.82	4478.49	26214.2
032	2.56926e+06	9435.68	1.10046e+06	1517.95	117.07	6589.68	4783.51	25656.1
034	1.69464e+06	4992.36	493151	1382.09	74.2966	4127.81	3779.8	26080.5
036	1.76042e+06	19262	525048	1922.7	84.2127	5256.07	2909.81	30078.2
037	992875	11739.6	193034	1546.88	73.7438	4455.08	2872.39	26585.3
041	1.87472e+06	34657.4	448879	2102.63	107.173	2207.4	3717.16	31463.1
042	2.07318e+06	19979.6	743280	2292.09	96.1301	1146.27	2865.17	28963.1
045	2.11289e+06	21982.7	449066	1324.31	133.011	2611.35	4572.73	26515.1
047	2.17808e+06	18793	674579	1739.67	153.692	2609.57	3650.11	26744.8
050	2.77398e+06	19520.2	804582	1088.68	182.583	3846.58	5377.05	27221.8
052	1.72119e+06	9142	279356	1472.68	113.409	2465.61	2867.58	27456
053	2.82017e+06	15326.4	468856	19115.7	191.402	4616.84	4252.66	27493.8
055	2.72177e+06	19730.3	1.10443e+06	1410.82	250.286	14932.6	6221.73	28331.8
057	1.35105e+06	24326.6	325628	3106.26	71.0639	7119.2	3449.08	30444.3
058	2.64554e+06	26066.7	859832	1449.93	140.232	10649.8	6378.27	28830.4
061	818079	20326.7	217139	3791.01	108.047	4434.53	4054.81	28208.9
062	1.53853e+06	21345.2	380878	7121.26	167.379	6394.16	15558.4	27863.8
063	1.41184e+06	25816.2	607367	1866.57	185.538	6278.92	15455.2	29590.7
067	2.71928e+06	61245.9	1.07746e+06	2019.94	262.99	17110.1	42889.4	29662.3
069	1.48572e+06	61431.2	393505	1965.72	135.235	7218.15	10958.2	27752.9
072	2.30475e+06	16668.4	1.00191e+06	2662.51	347.825	173542	36805.3	30411.5
073	2.55008e+06	17093.3	974800	1265.68	563.781	108648	108949	30176.6
075	2.25755e+06	25109.3	971111	1558.06	470.364	256091	53113.2	29898.1
077	1.78365e+06	25671.8	745246	5449.27	140.165	122288	17793.8	30044
078	1.63619e+06	23828.4	635701	1031.54	148.039	16871.2	14032.9	23828.9
081	1.87083e+06	23300.8	527369	4724.82	136.247	2044.7	4088.55	27980.4
084	2.12925e+06	16341.2	653542	6218.48	259.278	3117.17	5734	27087.5
087	1.90702e+06	8610.34	503628	3218.06	171.912	2378.72	3835.92	28674.4
088	1.93516e+06	27617.9	470192	4227.63	134.267	2987.53	3873.76	27835.1
089	2.10959e+06	10159.4	710312	3708.74	220.575	4839.26	4744.01	26695.5
091	1.29846e+06	11921.1	96218.9	16124.4	154.818	17663.5	8392.8	29214.7
092	2.29485e+06	11136.5	879674	2885.02	141.953	6230.48	6591.11	28390
094	2.32875e+06	23024.6	879170	5985.47	251.675	7949.17	6632.57	28232.4
095	1.83208e+06	15012.4	791639	3492	125.96	6275.26	4704.03	28705
100	2.17564e+06	16693.9	399777	10566.9	194.947	13785.2	4357.8	27297
101	824736	7814.79	72578.5	919.603	177.226	13175.7	5369.72	28438.1
104	312546	13423.5	25245	3740.76	98.5423	2181.1	2962.94	87786.5
105	1.68219e+06	19778.8	226591	1649.61	393.542	43488.4	11976.7	29634.5
107	421070	16646.3	36831	2841.99	110.522	4015.36	2404.71	33690.4
109	1.04407e+06	22130	73211.4	3150.49	190.103	13733.4	10887.2	28269.2
112	2.13246e+06	18852.3	191025	4977.96	398.684	9755.26	11340.6	34359.3
113	2.37644e+06	14191.9	457487	3721.47	313.15	4761.42	7394.07	28296.7
114	1.92624e+06	19244.5	162910	6818.74	246.301	2066.94	7005.41	29469.9
118	2.03585e+06	18582.4	250140	3725.02	296.962	4013.05	6289.66	26840
120	2.35177e+06	20671.8	260481	2877.21	388.096	8068.85	8805.48	27066.4
131	2.21127e+06	16233.8	381224	4140.67	373.821	8717.92	12028.8	27340.5
132	1.93365e+06	15195	360580	4172.34	284.49	23123.3	9573.09	28105.9
136	2.24959e+06	12640.8	702397	3329.41	926.984	28004.9	24691.7	28946.8
139	1.55855e+06	10342.2	224500	3814.25	197.018	12687.7	11480.9	29647.1
140	2.28302e+06	12175.4	450277	4360.61	374.926	21597.8	15886.1	27510.1
141	1.69934e+06	10161.2	289594	4338.74	1391.85	77712.7	70818.3	27217.1
142	2.03609e+06	11635.4	604333	3378.03	557.947	31751.9	24571.2	28258
145	2.1261e+06	9159.43	330008	4876.28	954.054	29986.1	26081.7	27054.9
146	2.01298e+06	22033.9	675126	5874.49	491.679	14551	36021.3	30695.1
149	1.78452e+06	24057.3	564196	4944.07	151.868	6544.8	5245.95	28787.8
161	2.32104e+06	21591.3	572631	3259.92	362.284	12638.9	5328.49	28056.8
163	2.58298e+06	29892.2	393666	3755.31	628.096	46309.4	16982.5	27877.9
166	1.518e+06	14278.1	265518	6946.85	240.029	44150.5	14200.5	27401.9
168	2.23456e+06	23625.9	867001	4918.27	698.662	61721.7	51892.1	27634.4
169	2.64017e+06	27775.2	598434	4212.53	825.288	61878	15907.2	26524
171	2.10289e+06	9561.14	340103	3028.68	204.77	7865.9	5756.69	27301.3
172	1.26775e+06	9923.04	179456	3622.69	132.237	2432.17	4023.8	27582.6
175	1.63491e+06	11930.2	221005	3337.4	243.465	3996.53	6359.64	27883.2
178	1.72073e+06	13341.2	278174	3776.44	625.341	21461.5	12005.3	26788
179	2.06015e+06	18672.4	348935	4034.82	357.203	10988.4	6758.91	27065
181	2.23318e+06	12778.9	1.06558e+06	5997.57	216.756	100527	33217.2	29343.6
182	2.42464e+06	21343	1.00385e+06	5496.73	484.433	86187.9	40789.4	26402.2
184	2.10087e+06	20059.1	916874	5683.01	268.624	7368.06	10754.6	27671.2
185	1.44729e+06	13224.4	1.09301e+06	5880.96	248.117	53635.2	14278.7	27828.3
190	2.56496e+06	14754.1	981357	5801.21	479.341	23099.6	16445.5	28385.2
191	1.73728e+06	11249.8	240529	4221.63	151.405	6850.35	5985.86	28250.2
192	2.33177e+06	13503.4	504847	3499.17	224.573	3747.14	6309.18	26048.5
195	2.4685e+06	14509.2	342349	3884.56	260.329	6796.93	6657.53	25506.5
196	1.78293e+06	10862.6	343989	4030.27	118.224	3126.04	3565.47	27940.9
197	2.34208e+06	13851	408512	4495.17	228.345	4376.58	3940.28	26476.9
201	2.53642e+06	14192	468255	4194.27	182.99	26108.2	9531.15	26377
204	1.91564e+06	15438.5	294262	4112.21	150.754	18388.3	9363.05	28543.4
205	1.82685e+06	11839.2	439346	2851.4	124.143	20198.9	5079.18	27063.2
207	2.22427e+06	24274.5	426895	4183.26	160.678	13077.1	5707.21	27476.5
210	2.2338e+06	23554.7	568742	3874.09	239.336	26010.4	8450.32	27164.3

## Sheet: Morphometrics
Sample	weight_mg	ovary_left_mm2	ovary_right_mm2	ovary_mean_mm2	ovary_max_mm2	spermatheca_mm	thorax_length_mm	thorax_width_mm	basitarsus_length_mm	basitarsus_width_mm	head_length_mm	head_width_mm	wing_length_mm	wing_width_mm
001	196	13.2	13.45	13.325	13.45	1.26	4.85	4.92	2.45	1.26	3.85	4.09	9.18	3.37
002	215.2	12.3	12.14	12.22	12.3	1.4	4.63	4.94	2.44	1.29	3.47	3.85	9.28	3.2
003	184.1	17.41	16.61	17.01	17.41	1.25	4.83	4.33	2.35	1.29	3.53	3.69	8.99	3.13
007	194.9	13.16	14.05	13.605	14.05	1.47	4.55	4.77	2.51	1.17	3.63	3.66	9.07	3.19
010	184.2	11.75	12.78	12.265	12.78	1.18	4.31	4.01	2.35	1.19	2.94	3.6	9.3	3.28
011	180.6	9.03	9.7	9.365	9.7	1.22	5.01	4.73	2.27	1.18	2.92	3.76	8.19	2.94
012	182.7	10.82	10.76	10.79	10.82	1.32	4.97	4.73	2.37	1.29	3.55	3.71	8.9	3.09
015	168	11.28	9.27	10.275	11.28	1.71	4.08	3.16	2.43	1.15	3.51	3.68	8.83	3.01
016	168.5	7.56	7.27	7.415	7.56	1.37	4.25	4.46	2.58	1.29	3.2	3.74	8.79	3.15
020	189.1	12.68	9.95	11.315	12.68	1.48	4.53	4.68	2.44	1.26	3.55	3.74	9.33	3.1
021	184.6	11.72	14.58	13.15	14.58	1.03	4.45	4.52	2.51	1.21	3.75	3.9	9.12	3.21
024	185.2	8.04	8.64	8.34	8.64	1.9	4.97	4.47	2.72	1.22	3.58	3.81	9.25	3.09
025	201.2	13.39	15.34	14.365	15.34	1.2	3.93	4.03	2.54	1.16	3.98	3.78	8.88	3.25
026	175.8	12.71	10.37	11.54	12.71	1.25	4.84	4.23	2.53	1.21	3.56	3.76	9	3.13
029	192.5	15.52	11.02	13.27	15.52	1.34	4.58	4.05	2.62	1.15	3.51	3.8	8.92	3.06
031	181.1	6.4	6.12	6.26	6.4	1.21	5.47	4.79	2.61	1.23	4.02	3.76	9.49	3.39
032	190.1	8.8	10.84	9.82	10.84	1.14	4.5	4.35	2.54	1.14	3.3	3.61	8.42	3.03
034	197	10.96	13.52	12.24	13.52	1.34	4.88	4.38	2.47	1.28	3.77	3.54	9.16	3.19
036	185.9	11.08	9.3	10.19	11.08	1.1	4.83	4.38	2.47	1.24	3.38	3.63	8.72	2.97
037	194.1	10.81	13.76	12.285	13.76	1.21	4.46	4.43	2.43	1.24	3.55	3.81	9.22	3.07
041	196.9	9.79	10.84	10.315	10.84	0.99	4.24	4.85	2.44	1.2	4.05	3.71	9.08	3.25
042	186.6	13.08	9.92	11.5	13.08	1.25	5.38	4.95	2.53	1.13	3.74	3.55	9.46	3.29
045	235.9	11.88	11.46	11.67	11.88	1.02	4.24	3.92	2.63	1.28	3.91	3.85	9.54	3.42
047	191.4	12.88	12.92	12.9	12.92	1.36	4.43	4.38	NA	NA	3.69	3.66	9.15	3.11
050	197.2	11.01	10.46	10.735	11.01	1.12	4.03	4.36	2.54	1.12	3.55	3.64	8.83	3.13
052	156.9	8.41	7.45	7.93	8.41	1.08	3.59	4.56	2.36	1.17	3.35	3.66	8.79	3.03
053	110.4	7.2	7.3	7.25	7.3	1.04	4.01	3.96	2.58	1.29	3.63	3.77	8.99	3.17
055	155.7	7.87	8.4	8.135	8.4	1.16	4.46	3.77	2.45	1.26	3.66	3.58	8.42	2.99
057	187.4	16.84	20.84	18.84	20.84	1.44	4.18	4.41	2.46	1.26	3.15	3.58	8.88	2.8
058	189.9	9.14	8.82	8.98	9.14	1.13	4.19	4.17	2.56	1.28	3.79	3.7	8.77	3.2
061	191.5	7.28	8.88	8.08	8.88	1.18	4.49	4.84	2.37	1.25	3.27	3.86	9.09	3.16
062	212.1	13.56	14.72	14.14	14.72	1.36	4.6	4.81	2.43	1.25	3.8	3.9	9.16	3.21
063	202.3	10.99	7.77	9.38	10.99	1.43	4.72	4.08	2.46	1.17	3.8	3.85	8.92	3.14
067	206.6	10.47	11.93	11.2	11.93	0.86	4.58	4.63	2.31	1.16	3.52	3.93	8.87	3.2
069	209.8	18.78	16.75	17.765	18.78	1.25	5	4.74	2.59	1.05	3.88	3.78	9.25	3.26
072	182.1	10.86	9.47	10.165	10.86	1.21	4.72	4.52	2.31	1.21	3.27	3.53	8.8	3.08
073	234.4	12.98	12.98	12.98	12.98	1.41	4.69	4.32	2.52	1.29	3.83	3.82	8.74	2.98
075	196.9	13.81	11.06	12.435	13.81	1.29	4.73	4.42	2.29	1.2	3.77	3.76	9.02	3.02
077	195.9	8.55	9.03	8.79	9.03	1.06	4.16	3.83	2.51	1.31	3.6	3.83	9.06	3.12
078	177.3	9.79	9.86	9.825	9.86	0.95	4.46	4.32	2.37	1.17	3.61	3.06	8.99	3.03
081	184.5	11.04	15.34	13.19	15.34	1.24	4.4	4.34	2.32	1.19	3.39	3.79	9.17	2.37
084	NA	18.9	13.45	16.175	18.9	1.42	4.4	4.58	2.46	1.25	3.86	3.84	8.7	2.96
087	205.7	22.22	20.4	21.31	22.22	1.07	4.47	4	2.31	1.2	3.6	3.5	8.82	2.89
088	205.5	17.36	20.15	18.755	20.15	1.42	4.47	4.41	2.48	1.23	3.57	3.82	9.05	3.12
089	194.6	22.73	16.48	19.605	22.73	1.87	4.4	4.43	2.46	1.18	3.62	3.62	8.83	2.84
091	220.1	24.43	24.61	24.52	24.61	1.73	4.13	4.71	2.4	1.21	3.33	3.81	8.79	2.99
092	206.1	14.54	15.54	15.04	15.54	1.66	4.26	4.53	2.46	1.14	3.61	3.53	8.78	2.97
094	196.1	28.87	23.22	26.045	28.87	1.22	4.44	4.24	2.56	1.22	3.74	3.72	9.04	3.2
095	186.2	0	0	NA	NA	NA	4.61	4.55	2.35	1.04	3.49	3.54	8.48	2.82
100	180.1	10.41	13.38	11.895	13.38	1.4	4.31	4.12	2.48	1.23	3.68	3.75	9.58	3.1
101	173.7	18.19	19.25	18.72	19.25	0.87	4.41	3.33	2.33	1	3.43	3.43	8.14	3
104	197.9	20.79	19.21	20	20.79	2.13	4.82	4.14	2.42	1.05	3.61	3.62	8.68	3.14
105	234.8	25.8	25.64	25.72	25.8	1.53	4.74	4.56	2.42	1.12	3.74	3.66	8.67	2.94
107	185.9	17.1	19.06	18.08	19.06	1.06	4.37	3.83	2.18	1.14	3.23	3.59	8.76	2.89
109	218.2	24.47	17.77	21.12	24.47	1.38	4.38	4.17	2.35	1.12	2.92	3.55	9.35	2.86
112	252	35.24	32.56	33.9	35.24	0.9	4.85	4.78	2.51	1.23	3.15	3.78	9.09	3.12
113	240.4	32.49	32.56	32.525	32.56	1.66	4.67	4.45	2.44	1.04	3.75	3.75	9.04	3.18
114	242.1	21.99	26.17	24.08	26.17	1.46	4.14	4.35	2.48	1.12	3.52	3.76	8.41	2.88
118	285.4	35.67	39.34	37.505	39.34	1.37	4.58	4.15	2.62	1.27	3.61	3.9	8.98	3.11
120	248.7	41.15	30.52	35.835	41.15	1.53	4.62	4.06	2.5	1.3	3.72	3.86	9.06	3.01
131	218	15.42	17.17	16.295	17.17	1.24	4.28	4.34	2.59	1.29	3.29	3.37	9.44	3.25
132	212.1	18.7	19.3	19	19.3	1.022	4.3	4.06	2.4	1.27	3.43	3.86	8.79	3.2
136	206.6	16.12	21.88	19	21.88	0.93	4.16	4.29	2.44	1.2	3.62	3.58	8.72	2.99
139	198.3	15.98	12.4	14.19	15.98	1.34	4.2	3.99	2.62	1.24	3.6	3.44	8.97	3.04
140	201.9	19.05	18.25	18.65	19.05	0.96	4.41	3.97	2.58	1.27	3.72	3.77	9.14	3.14
141	208.6	21.27	15.79	18.53	21.27	1.18	4.15	4.28	2.58	1.28	3.69	3.98	9.59	2.92
142	167	9.99	10.05	10.02	10.05	1.31	4.03	3.93	2.31	1.24	3.58	3.61	8.27	3.02
145	224.6	22.13	22.84	22.485	22.84	1.62	4.45	4.56	2.56	1.26	3.86	3.78	9.29	3.03
146	216.4	21.47	26.09	23.78	26.09	1.44	4.93	4.08	2.53	1.24	3.76	3.99	9.16	3.13
149	197.8	20.98	18.66	19.82	20.98	1.38	4.43	4.27	2.29	1.17	3.78	3.75	8.63	3
161	206.2	17.07	17.86	17.465	17.86	1.81	4.35	4.53	2.48	1.18	3.4	3.83	9.06	3.03
163	226.8	16.35	22.79	19.57	22.79	1.39	4.81	4.54	2.58	1.23	3.68	3.77	9.19	3.07
166	261.2	30.91	35.3	33.105	35.3	1.32	4.42	4.16	2.53	1.2	3.72	3.79	9.12	3.17
168	220.9	22.65	20.65	21.65	22.65	1.95	4.79	4.51	2.37	1.08	3.62	3.79	9.21	3.1
169	246.8	21.55	28.66	25.105	28.66	1.58	4.38	4.95	2.66	1.08	3.36	3.69	9.16	3.21
171	231.1	23.5	21.48	22.49	23.5	1.2	4.54	4.2	2.61	1.29	3.81	3.74	9.01	3.1
172	202.9	20.93	22.92	21.925	22.92	1.23	4.33	4.36	2.39	1.12	3.69	3.63	8.71	3
175	225	21.28	22.56	21.92	22.56	0.84	4.64	4.24	2.5	1.15	3.69	3.7	8.84	3.2
178	238.5	31.58	24.89	28.235	31.58	1.62	4.79	4.33	2.34	1.12	3.57	3.64	8.56	2.97
179	248.8	NA	NA	NA	NA	NA	4.98	4.45	2.46	1.26	3.6	3.92	9.34	3.12
181	255.9	24.75	20.11	22.43	24.75	1.16	4.45	4.19	2.45	1.24	3.76	3.89	9.59	3.44
182	211.6	32.43	32.63	32.53	32.63	1.21	4.47	3.8	2.37	1.14	3.51	3.41	8.94	2.98
184	198.5	21.53	26.45	23.99	26.45	1.17	4.34	4.41	2.2	1.06	3.57	3.71	8.81	3.07
185	232.3	26.79	30.33	28.56	30.33	1.24	4.79	4.22	2.35	1.19	3.61	3.72	9.09	3.03
190	204.6	24.22	23.47	23.845	24.22	0.9	4.41	4.36	2.35	1.2	3.44	3.53	8.92	2.75
191	212	25.69	18.75	22.22	25.69	1.14	3.92	4.16	2.25	1.16	3.67	3.71	8.63	2.31
192	229.1	NA	NA	NA	NA	0.87	4.89	4.33	2.31	1.17	3.5	3.95	9.14	3.23
195	244.1	28.13	18.59	23.36	28.13	1.04	4.36	4	2.54	1.2	3.81	3.82	9.15	3.08
196	243	12.31	14.44	13.375	14.44	1.41	4.7	4.45	2.52	1.24	3.77	3.88	9.26	2.31
197	211.2	19.69	16.37	18.03	19.69	1.35	4.52	4.14	2.38	1.16	3.61	3.69	8.57	2.92
201	211.3	16.31	18.68	17.495	18.68	1.21	4.67	4.3	2.59	1.36	3.97	3.79	9.26	2.69
204	193.9	17.23	19.07	18.15	19.07	1.22	4.9	4.44	2.51	1.12	3.65	3.72	9.31	2.88
205	179.1	16.14	13.76	14.95	16.14	1.39	4.55	3.93	2.62	1.22	3.67	3.74	9.06	2.94
207	207	12.51	13.91	13.21	13.91	1.17	4.57	4.27	2.44	1.21	3.74	3.84	8.91	3.16
210	210.6	14.96	20.34	17.65	20.34	1.33	4.1	4.81	2.52	1.18	3.63	3.91	9.12	3.15
