# Supplementary material for: Pheromone and morphometric features of honey bee (Apis mellifera) queens from around the globe
Source: Research Square preprint supplement (doi:10.21203/rs.3.rs-7586652/v1), 2025-09-25
Supplement: Supplementary file 2 [file cf8d1b1d4a4e3baec1fb3129.docx]

Pheromone and morphometric features of honey bee (*Apis mellifera*) queens from around the globe

Alison McAfee1,2‡*, Brendan Daisley3‡, Dylan Brettingham3, Elizabeth Mallory3, Christine Macpherson3, Armando Alcazar Magaña1,4, Emma Allen-Vercoe3, David R Tarpy2, and Leonard J Foster1,4*

1. Michael Smith Laboratories, Department of Biochemistry and Molecular Biology, University of British Columbia, Vancouver, BC, Canada
2. Department of Applied Ecology, North Carolina State University, Raleigh, NC, USA
3. Molecular and Cellular Biology, University of Guelph, Guelph, ON, Canada
4. Life Sciences Institute, Department of Biochemistry and Molecular Biology, University of British Columbia, Vancouver, BC, Canada

‡ These authors contributed equally

*Corresponding authors: [alison.n.mcafee@gmail.com](mailto:alison.n.mcafee@gmail.com) (AM), [foster@msl.ubc.ca](mailto:foster@msl.ubc.ca) (LJF)

**Supplementary Figures**


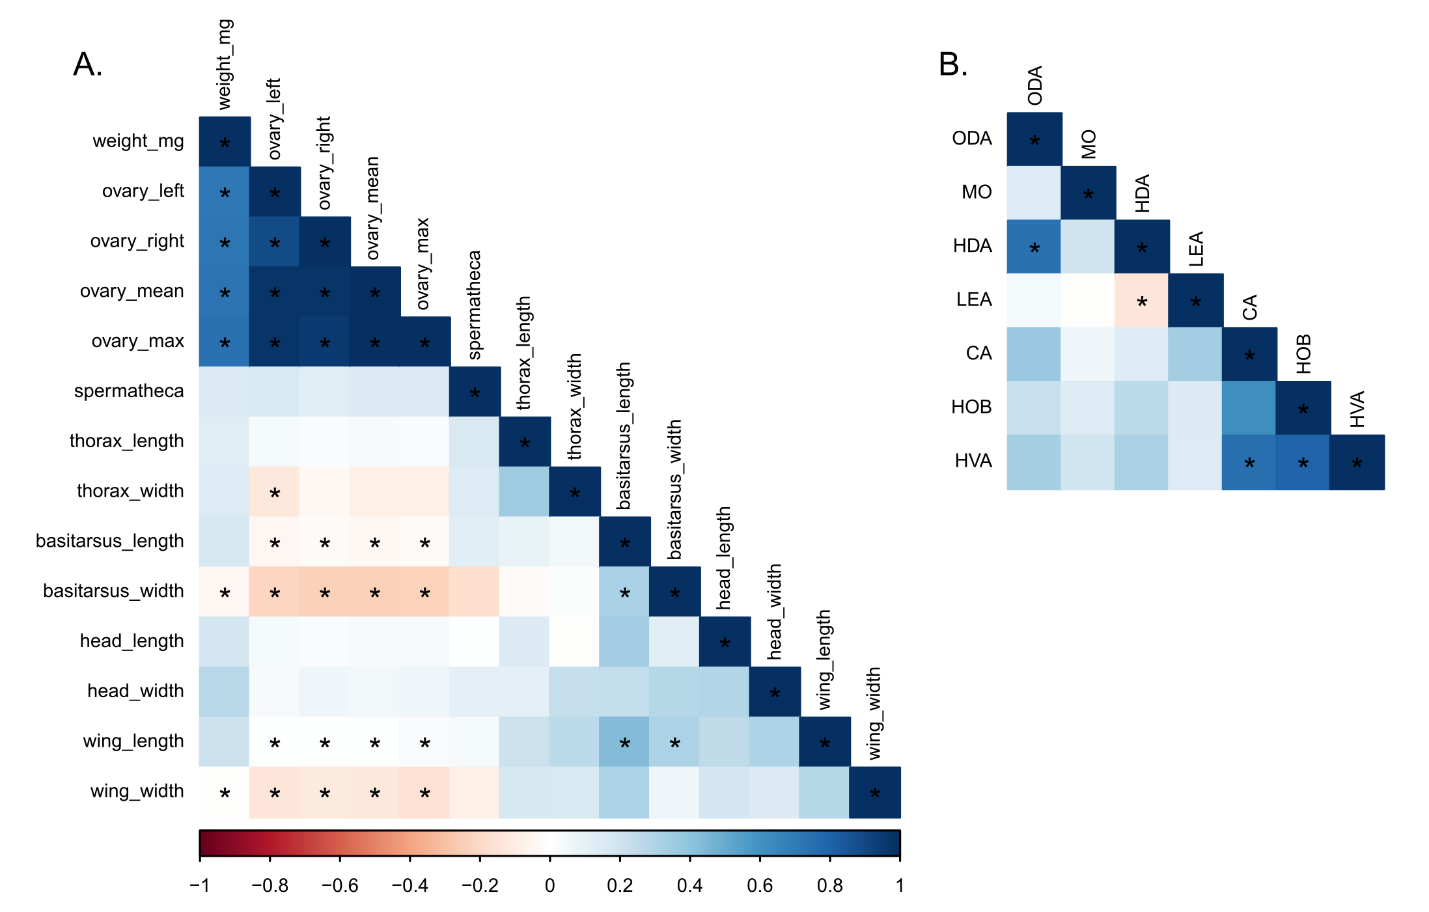


**Figure S1. Pearson correlation matrices.** Asterisks indicate significant p values (no multiple hypothesis testing correction). A) Morphometric measurements. B) Pheromone measurements. ODA = E-9-oxodec-2-enoic acid; HDA = 9(R/S)-hydroxydec-2(E)-enoic acid, MO = methyl oleate, LEA = linolenic acid, CA = coniferyl alcohol, HOB = methyl p-hydroxybenzoate, HVA = 4-hydroxy-3-methoxyphenylethanol.


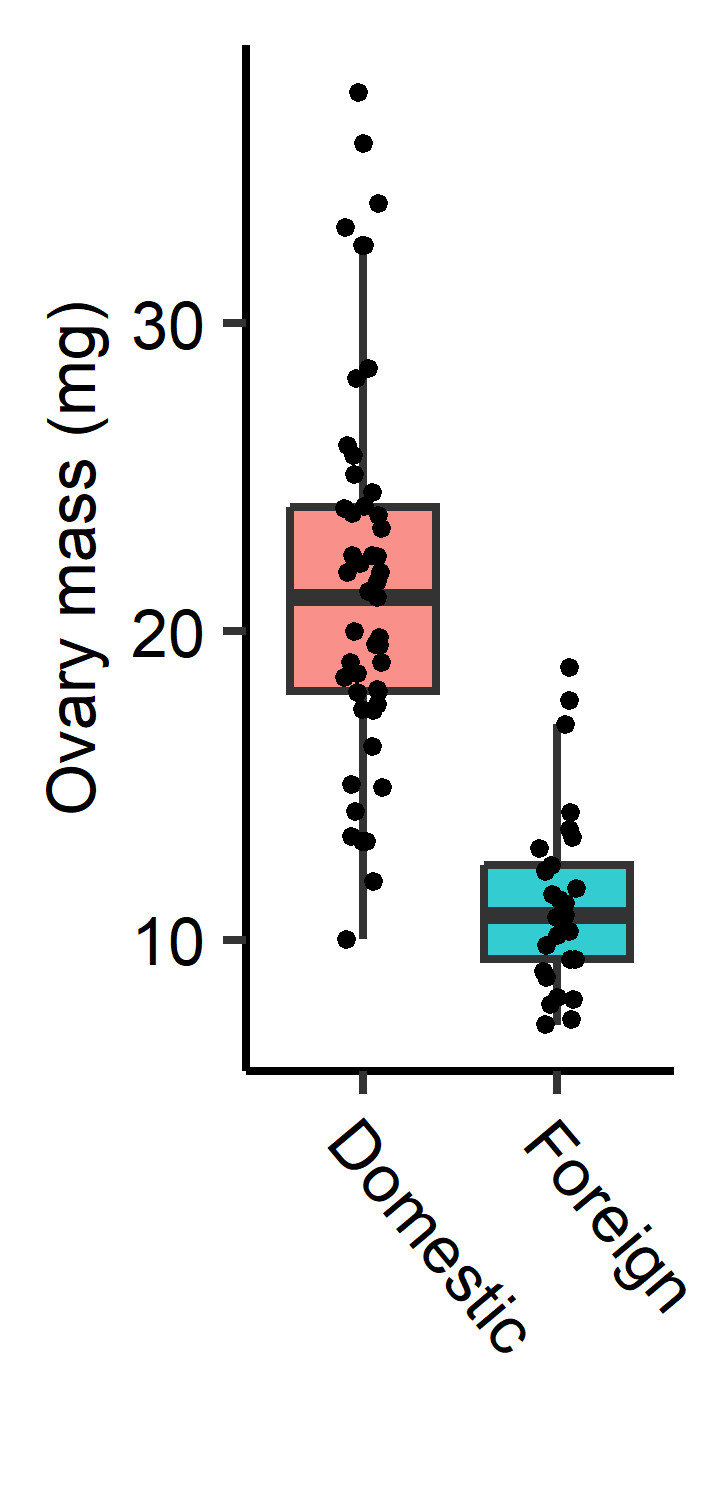


**Figure S2. Ovary masses in domestic (Canadian) and international queens.** Welch’s t test; t=8.4, df=78, p=1.5x10-12.
